# Supplementary material
Source: PubMed Central journal article supplement (PMC9589856)
Supplement: 41575_2022_698_MOESM1_ESM.pdf [file 41575_2022_698_MOESM1_ESM.pdf]

Perspective

 Check for updates

---

# Gut microbiota in COVID-19: key microbial changes, potential mechanisms and clinical applications

---

In the format provided by the authors and unedited

---

## Supplementary information

### **Supplementary Box 1 | Search strategy and study selection criteria.**

We searched the PubMed, Web of Science, Google Scholar, Cochrane Library, MEDLINE, and Embase (between December 31, 2019 and August 28, 2022) by using the keywords 'COVID-19' or 'SARS-CoV-2' or 'Coronavirus' in combination with the terms 'gut microbiota' or 'microbiota' or 'microbes' or 'bacteria' or 'viruses' 'fungi' or 'probiotics' or 'prebiotics' or 'diet' or 'nutrition' 'gastrointestinal tract' or 'intestine' or 'gut' or 'faecal shedding' or 'ACE2' to identify relevant English-language publications. A total of 417 articles were selected, including 75 clinical studies, *in vitro* and *in vivo* studies, systematic reviews, and high-quality narrative reviews. Additionally, we searched [ClinicalTrials.gov](https://clinicaltrials.gov) for unpublished trials.

**Supplementary Table 1 | Clinical studies reporting gut microbiome composition in COVID-19.**

Supplementary Table 1 summarises selected human observational studies reporting gut microbiota composition of patients with acute and post-acute COVID-19. As of August 2022, a total of 46 human studies (38 acute COVID-19; 8 post-acute COVID-19) showed alterations of gut microbiota composition in patients with COVID-19 compared with uninfected controls. The region, sample size of study participants, sequencing method and results of alterations of gut microbiota composition in patients with COVID-19 compared with controls are presented. COVID-19, coronavirus disease 2019; ITS, internal transcribed spacer; PACS, post-acute COVID-19 syndrome; qPCR, quantitative PCR; rRNA, ribosomal RNA; MIS-C, multisystem inflammatory syndrome in children.

| Studies                                    | Region                            | Study participants                                                                                                   | Disease phase | Sequencing method                                | Alterations in Gut Microbiota                                                                                                                                                                                                                                                                                                                                                                                                                                                                                                                                                                                                                                                                                                                                                                                                                                                             |
|--------------------------------------------|-----------------------------------|----------------------------------------------------------------------------------------------------------------------|---------------|--------------------------------------------------|-------------------------------------------------------------------------------------------------------------------------------------------------------------------------------------------------------------------------------------------------------------------------------------------------------------------------------------------------------------------------------------------------------------------------------------------------------------------------------------------------------------------------------------------------------------------------------------------------------------------------------------------------------------------------------------------------------------------------------------------------------------------------------------------------------------------------------------------------------------------------------------------|
| Romani, et al. <sup>51</sup> (2022)        | Rome, Italy                       | 68 patients with COVID-19; 16 non-COVID-19 control; 4 patients with MIS-C; 95 healthy controls                       | Acute         | 16S rRNA gene sequencing                         | Enriched bacterial taxa in patients with COVID-19: <i>Faecalibacterium</i> , <i>Fusobacterium</i> , and <i>Neisseria</i><br>Enriched bacterial taxa in healthy controls: <i>Bifidobacterium</i> , <i>Blautia</i> , <i>Ruminococcus</i> , <i>Collinsella</i> , <i>Coprococcus</i> , <i>Eggerthella</i> , and <i>Akkermansia</i>                                                                                                                                                                                                                                                                                                                                                                                                                                                                                                                                                            |
| Mizutani, et al. <sup>52</sup> (2022)      | Tokyo, Japan                      | 22 patients with COVID-19(7 mild, 8 moderate, 1 severe); 40 healthy individuals as controls                          | Acute         | 16S rRNA gene sequencing                         | Enriched bacterial taxa in patients with COVID-19: <i>Bifidobacterium</i> , <i>Bacteroides</i> , <i>Parabacteroides</i> and <i>Escherichia-Shigella</i><br>Enriched bacterial taxa in controls: <i>Faecalibacterium</i> , <i>Subdoligranulum</i> , <i>Dorea</i> and <i>Enterobacter</i>                                                                                                                                                                                                                                                                                                                                                                                                                                                                                                                                                                                                   |
| Rafiqul Islam, et al. <sup>53</sup> (2022) | Chattogram, Bangladesh            | 22 patients with COVID-19; 15 healthy controls                                                                       | Acute         | 16S rRNA gene sequencing                         | Enriched bacterial taxa in patients with COVID-19: <i>Bacteroides</i> , <i>Escherichia-Shigella</i> , <i>Enterococcus</i> , <i>Bifidobacterium</i> , <i>Megamonas</i> , <i>Streptococcus</i> , <i>Rothia</i> , <i>Klebsiella</i> , and <i>Veillonella</i>                                                                                                                                                                                                                                                                                                                                                                                                                                                                                                                                                                                                                                 |
| Schult, et al. <sup>54</sup> (2022)        | Freiburg, Germany                 | 108 patients with COVID-19; 22 post-COVID-19; 20 with pneumonia as controls; 26 asymptomatic individuals as controls | Acute         | 16S rRNA gene sequencing                         | The occurrence of individual complications was correlated with low-risk (e.g. <i>Faecalibacterium prausnitzii</i> ) and high-risk bacteria (e.g. <i>Parabacteroides</i> )                                                                                                                                                                                                                                                                                                                                                                                                                                                                                                                                                                                                                                                                                                                 |
| Sun, et al. <sup>55</sup> (2022)           | Shanghai, China                   | 63 patients with COVID-19 (39 mild, 24 severe); 8 healthy individuals as controls                                    | Acute         | Shotgun metagenomic sequencing                   | Positive correlation with COVID-19 severity: <i>Burkholderia contaminans</i> , <i>Bacteroides nordii</i> , <i>Bifidobacterium longum</i> , and <i>Blautia sp. CAG 257</i>                                                                                                                                                                                                                                                                                                                                                                                                                                                                                                                                                                                                                                                                                                                 |
| Britton, et al. <sup>56</sup> (2021)       | New York, USA                     | 44 patients with COVID-19; (6 mild, 22 moderate, 16 severe)                                                          | Acute         | Shotgun metagenomic and 16S rRNA gene sequencing | Gut microbiome of patients with COVID-19 is unrelated to disease severity or gastrointestinal symptoms                                                                                                                                                                                                                                                                                                                                                                                                                                                                                                                                                                                                                                                                                                                                                                                    |
| Gaibani, et al. <sup>57</sup> (2021)       | Bologna, Italy                    | 69 patients as COVID-19; 69 healthy individuals as controls                                                          | Acute         | 16S rRNA gene sequencing                         | Enriched bacterial taxa in patients with COVID-19: <i>Lactobacillus</i> , <i>Collinsella</i> , <i>Staphylococcus</i> , <i>Akkermansia</i> , <i>Parabacteroides</i> , <i>Actinomyces</i> , <i>Serratia</i> , <i>Lactococcus</i> , <i>Phascolarctobacterium</i> , <i>ErysipelotrichaceaePSBM3</i> , <i>Odoribacter</i> , <i>Acidaminococcus</i> , <i>Methanobrevibacter</i><br><br>Enriched Bacterial taxa in controls: <i>Prevotella</i> , <i>Bacteroides</i> , <i>Faecalibacterium</i> , <i>Coprococcus</i> , <i>Blautia</i> , <i>Ruminococcus</i> , <i>Erwinia</i> , <i>Roseburia</i> , <i>Oxalobacter</i> , <i>Clostridiaceae</i> , <i>Anaerofustis</i> , <i>Lachnospira</i> , <i>Scardovia</i> , <i>Anaerofilum</i> , <i>Dialister</i> , <i>Oscillospira</i> , <i>Holdemania</i> , <i>Cloacibacillus</i> , <i>Christensenella</i> ,<br><br>Reduced diversity in patients with COVID-19 |
| Li, et al. <sup>58</sup> (2021)            | Beijing, China<br>Changsha, China | 47 patients with COVID-19; (7 mild, 25 moderate, 12 severe)                                                          | Acute         | Shotgun metagenomic sequencing                   | Enriched bacterial taxa in patients with COVID-19: <i>Bacteroides stercoris</i> , <i>Bacteroides vulgatus</i> , <i>Bacteroides massiliensis</i> , <i>Bifidobacterium longum</i> , <i>Streptococcus thermophilus</i> , <i>Lachnospiraceae bacterium 5163FAA</i> ,                                                                                                                                                                                                                                                                                                                                                                                                                                                                                                                                                                                                                          |

|                                              |                              |                                                                                                             |       |                          |                                                                                                                                                                                                                                                                                                                                                                                                                                                                                                                                                                                                                                                                                                                                                                                                                           |
|----------------------------------------------|------------------------------|-------------------------------------------------------------------------------------------------------------|-------|--------------------------|---------------------------------------------------------------------------------------------------------------------------------------------------------------------------------------------------------------------------------------------------------------------------------------------------------------------------------------------------------------------------------------------------------------------------------------------------------------------------------------------------------------------------------------------------------------------------------------------------------------------------------------------------------------------------------------------------------------------------------------------------------------------------------------------------------------------------|
|                                              |                              | severe, 3 critical); 19 healthy individuals as controls                                                     |       |                          | <p><i>Prevotella bivia</i>, <i>Erysipelotrichaceae</i> bacterium 6145, <i>Erysipelotrichaceae</i> bacterium 2244A</p> <p>Enriched bacterial taxa in controls:<br/><i>Clostridium nexile</i>, <i>Streptococcus salivarius</i>, <i>Coprococcus catus</i><br/><i>Eubacterium hallii</i>, <i>Enterobacter aerogenes</i>, <i>Adlercreutzia equolifaciens</i></p> <p>Negative correlation with COVID-19 severity:<br/><i>Roseburia inulinivorans</i>, <i>Bacteroides faecis</i>, <i>Megasphaera unclassified</i>, <i>Bifidobacterium bifidum</i>, <i>Parabacterioides goldsteinii</i>, <i>Lachnospiraceae</i> bacterium 9143BFAA</p> <p>Positive correlation with COVID-19 severity:<br/><i>Paraprevotella unclassified</i>, <i>Streptococcus thermophilus</i>, <i>Clostridium ramosum</i>, <i>Bifidobacterium animalis</i></p> |
| Moreira-Rosário, et al. <sup>59</sup> (2021) | Lisbon, Portugal             | 115 patients with COVID-19; (19 mild, 37 moderate, 59 severe)                                               | Acute | 16S rRNA gene sequencing | Compared with patients with mild COVID-19, those with more severe disease had: lower <i>Firmicutes:Bacteroidetes</i> ratio; higher abundance of <i>Proteobacteria</i> ; and lower abundance <i>Roseburia</i> and <i>Lachnospira</i>                                                                                                                                                                                                                                                                                                                                                                                                                                                                                                                                                                                       |
| Newsome, et al. <sup>510</sup> (2021)        | Mississippi, USA             | 50 patients with COVID-19; 9 individuals recovered from COVID-19; 24 healthy individuals as controls        | Acute | 16S rRNA gene sequencing | Enriched bacterial taxa in patients with COVID-19:<br><i>Peptoniphilus</i> , <i>Corynebacterium</i> and <i>Campylobacter</i>                                                                                                                                                                                                                                                                                                                                                                                                                                                                                                                                                                                                                                                                                              |
|                                              |                              |                                                                                                             |       |                          | Enriched bacterial taxa in patients with SARS-CoV-2-positive stool:<br><i>Klebsiella</i> and <i>Agathobacter</i>                                                                                                                                                                                                                                                                                                                                                                                                                                                                                                                                                                                                                                                                                                          |
| Reinold, et al. <sup>511</sup> (2021)        | Essen, Germany               | 117 patients with COVID-19 (79 non-severe, 26 severe, 12 critical); 95 hospitalised individuals as controls | Acute | 16S rRNA gene sequencing | Enriched bacterial taxa in patients with COVID-19:<br><i>Bacteroides</i> , <i>Enterobacteriaceae</i>                                                                                                                                                                                                                                                                                                                                                                                                                                                                                                                                                                                                                                                                                                                      |
|                                              |                              |                                                                                                             |       |                          | Enriched bacterial taxa in controls:<br><i>Bifidobacterium</i> , <i>Streptococcus</i> , <i>Collinsella</i>                                                                                                                                                                                                                                                                                                                                                                                                                                                                                                                                                                                                                                                                                                                |
|                                              |                              |                                                                                                             |       |                          | Negative correlation with COVID-19 severity:<br><i>Faecalibacterium</i> and <i>Roseburia</i>                                                                                                                                                                                                                                                                                                                                                                                                                                                                                                                                                                                                                                                                                                                              |
|                                              |                              |                                                                                                             |       |                          | Lower bacterial richness in COVID-19                                                                                                                                                                                                                                                                                                                                                                                                                                                                                                                                                                                                                                                                                                                                                                                      |
| Ren, et al. <sup>512</sup> (2021)            | Central China and East China | 36 patients with COVID-19; 70 healthy individuals as controls                                               | Acute | 16S rRNA gene sequencing | Enriched bacterial taxa in patients with COVID-19:<br>lipopolysaccharide-producing bacteria                                                                                                                                                                                                                                                                                                                                                                                                                                                                                                                                                                                                                                                                                                                               |
|                                              |                              |                                                                                                             |       |                          | Enriched bacterial taxa in controls:<br>butyrate-producing bacteria                                                                                                                                                                                                                                                                                                                                                                                                                                                                                                                                                                                                                                                                                                                                                       |
|                                              |                              |                                                                                                             |       |                          | Reduced diversity in patients with COVID-19                                                                                                                                                                                                                                                                                                                                                                                                                                                                                                                                                                                                                                                                                                                                                                               |
| Wu, et al. <sup>513</sup> (2021)             | Zhuhai, China                | 53 patients with COVID-19; 76 healthy individuals as controls                                               | Acute | 16S rRNA gene sequencing | Enriched bacterial taxa in patients with COVID-19:<br><i>Streptococcus</i> , <i>Weissella</i> , <i>Enterococcus</i> , <i>Rothia</i> , <i>Lactobacillus</i> , <i>Actinomyces</i> , <i>Granulicatella</i> , <i>Clostridium citroniae</i> , <i>Bifidobacterium longum</i> , and <i>Rothia mucilaginosa</i>                                                                                                                                                                                                                                                                                                                                                                                                                                                                                                                   |
|                                              |                              |                                                                                                             |       |                          | Enriched bacterial taxa in controls:<br><i>Blautia</i> , <i>Coprococcus</i> and <i>Collinsella</i> , <i>Bacteroides caccae</i> , <i>Bacteroides coprophilus</i> , <i>Blautia obeum</i> and <i>Clostridium colinum</i>                                                                                                                                                                                                                                                                                                                                                                                                                                                                                                                                                                                                     |
| Xu, et al. <sup>514</sup> (2021)             | Shanghai, China              | 35 patients with COVID-19 (34 mild, 1 severe); 19 healthy individuals as                                    | Acute | 16S rRNA gene sequencing | Reduced diversity in patients with COVID-19                                                                                                                                                                                                                                                                                                                                                                                                                                                                                                                                                                                                                                                                                                                                                                               |

|                                           |                                 |                                                                                                                            |       |                                |                                                                                                                                                                                                                                                                                                                                                                                                                                                                                                                                                                             |
|-------------------------------------------|---------------------------------|----------------------------------------------------------------------------------------------------------------------------|-------|--------------------------------|-----------------------------------------------------------------------------------------------------------------------------------------------------------------------------------------------------------------------------------------------------------------------------------------------------------------------------------------------------------------------------------------------------------------------------------------------------------------------------------------------------------------------------------------------------------------------------|
|                                           |                                 | controls;<br>10 patients with other diseases (non-COVID)                                                                   |       |                                |                                                                                                                                                                                                                                                                                                                                                                                                                                                                                                                                                                             |
| Yeoh, et al. <sup>515</sup> (2021)        | Hong Kong, China                | 100 patients with COVID-19 (47 mild, 45 moderate, 5 severe, 3 critical); 78 uninfected individuals as controls             | Acute | Shotgun metagenomic sequencing | Enriched bacterial taxa in controls:<br><i>Faecalibacterium prausnitzii</i> , <i>Eubacterium rectale</i> and <i>Bifidobacteria</i><br><br>Negative correlation with COVID-19 severity:<br><i>Faecalibacterium prausnitzii</i> and <i>Bifidobacterium bifidum</i>                                                                                                                                                                                                                                                                                                            |
| Zhou, et al. <sup>516</sup> (2021)        | Wuhan, China                    | 187 patients with COVID-19 (187 moderate)                                                                                  | Acute | Shotgun metagenomic sequencing | Enriched bacterial taxa in patients with COVID-19 with fever:<br><i>Enterococcus faecalis</i> and <i>Saccharomyces cerevisiae</i><br><br>Enriched bacterial taxa in patients with COVID-19 with non-fever:<br><i>Bacteroides fragilis</i> and <i>Eubacterium ramulus</i>                                                                                                                                                                                                                                                                                                    |
| Al Bataineh, et al. <sup>517</sup> (2021) | Abu Dhabi, United Arab Emirates | 86 patients with COVID-19;<br>57 healthy individuals as controls                                                           | Acute | 16S rRNA gene sequencing       | Enriched bacterial taxa in patients with COVID-19:<br><i>Blautia</i> , <i>Faecalibacterium</i> , and <i>Streptococcus</i> .<br><br>Enriched bacterial taxa in controls:<br><i>Intestinibacter</i> , <i>Enterorhabdus</i> , <i>Anaerostipes</i> , <i>Bifidobacterium</i> , <i>Bacteroides</i> , and <i>Prevotella</i> .                                                                                                                                                                                                                                                      |
| Babszky, et al. <sup>518</sup> (2021)     | Budapest, Hungary               | 20 athletes with COVID-19 (3 mild, 15 moderate, 2 severe); 20 non-athletes with COVID-19 as controls (7 mild, 13 moderate) | Acute | 16S rRNA gene sequencing       | Statistically significant differences were not found in microbiota of trained and untrained individuals.                                                                                                                                                                                                                                                                                                                                                                                                                                                                    |
| Gu, et al. <sup>519</sup> (2020)          | Zhejiang, China                 | 30 patients with COVID-19;<br>24 patients with H1N1;<br>30 healthy individuals as controls                                 | Acute | 16S rRNA gene sequencing       | Enriched bacterial taxa in patients with COVID-19:<br><i>Streptococcus</i> , <i>Rothia</i> , <i>Veillonella</i> , <i>Erysipelatoclostridium</i> , <i>Actinomyces</i><br><br>Enriched bacterial taxa in controls:<br><i>Romboutsia</i> , <i>Faecalibacterium</i> , <i>Fusicatenibacter</i> , <i>Eubacterium hallii</i> , <i>Agathobacter</i> , <i>Ruminococcus torques</i> , <i>Klebsiella</i> , <i>Dorea</i> , <i>Anaerostipes</i> , <i>Intestinibacter</i> , <i>Clostridium_sensu_stricto_1</i> , <i>Turicibacter</i> .<br><br>Reduced diversity in patients with COVID-19 |
| Tang, et al. <sup>520</sup> (2020)        | Hangzhou, China                 | 57 patients with COVID-19 (20 general, 19 severe, 18 critical)                                                             | Acute | qPCR                           | Enriched bacterial taxa in patients with COVID-19 (critically ill):<br><i>Enterococcus</i> , <i>Enterobacteriaceae</i><br><br>Enriched bacterial taxa in controls:<br><i>Faecalibacterium prausnitzii</i> , <i>Clostridium butyricum</i> , <i>Clostridium leptum</i> , and <i>Eubacterium rectale</i>                                                                                                                                                                                                                                                                       |
| Tao, et al. <sup>521</sup> (2020)         | Hefei, China                    | 62 patients with COVID-19;<br>33 patients with seasonal flu;<br>40 healthy individuals as controls                         | Acute | 16S rRNA gene sequencing       | Enriched bacterial taxa in patients with COVID-19:<br><i>Escherichia</i> , <i>Streptococcus</i> , <i>Clostridium</i> , <i>Veillonella</i> , <i>Lactobacillus</i> , <i>Bifidobacterium</i> , <i>Scardovia</i> , <i>Helicobacter</i> , <i>Actinomyces</i> , <i>Moryella</i> , <i>Proteus</i> , <i>Rothia</i> , <i>Shuttleworthia</i> , <i>Enterococcus</i><br><br>Enriched bacterial taxa in controls:<br><i>Bacteroidetes</i> , <i>Roseburia</i> , <i>Faecalibacterium</i> , <i>Coprococcus</i> , <i>Ruminococcus</i> , <i>Lachnospira</i> and <i>Parabacteroides</i>        |

|                                                     |                                |                                                                                                                                                                         |            |                                |                                                                                                                                                                                                                                                                                   |
|-----------------------------------------------------|--------------------------------|-------------------------------------------------------------------------------------------------------------------------------------------------------------------------|------------|--------------------------------|-----------------------------------------------------------------------------------------------------------------------------------------------------------------------------------------------------------------------------------------------------------------------------------|
| Zuo, et al. <sup>522</sup><br>(2021)                | Hong Kong, China               | 98 patients with COVID-19 (3 asymptomatic, 53 mild, 34 moderate, 5 severe, 3 critical);<br>78 healthy individuals as control                                            | Acute      | Shotgun metagenomic sequencing | Enriched viral taxa in patients with COVID-19:<br>Environment-derived eukaryotic DNA viruses<br>Enriched viral taxa in controls: Pepper mild mottle virus (RNA virus) and multiple bacteriophage lineages (DNA viruses)                                                           |
| Maeda, et al. <sup>523</sup> (2022)                 | Osaka, Japan                   | 78 patients with COVID-19 (40 severe patients and 38 mild patients); 30 healthy individuals                                                                             | Acute      | ITS rRNA Sequencing            | The prevalence of <i>Candida albicans</i> is higher in severe and mild groups than in healthy control group.                                                                                                                                                                      |
| Lv, et al. <sup>524</sup><br>(2021).                | Zhejiang, China                | 67 patients with COVID-19 (31 non-severe, 36 severe);<br>35 patients with H1N1; 48 healthy individuals as controls                                                      | Acute      | ITS rRNA Sequencing            | Enriched fungal taxa in controls:<br><i>Aspergillus</i> and <i>Penicillium</i><br>Higher fungal burden in patients with COVID-19                                                                                                                                                  |
| Zuo, et al. <sup>525</sup><br>(2020)                | Hong Kong, China               | 30 patients with COVID-19 (1 asymptomatic, 12 mild, 10 moderate, 5 severe, 2 critical);<br>9 patients with pneumonia as controls;<br>30 healthy individuals as controls | Acute      | Shotgun metagenomic sequencing | Enriched fungal taxa in patients with COVID-19:<br><i>Candia albicans</i><br>Highly heterogeneous mycobiome configuration in patients with COVID-19                                                                                                                               |
| Chen, et al. <sup>526</sup><br>(2022)<br>Post-acute | China                          | 30 patients with COVID-19;<br>30 uninfected individuals as controls; 6-month follow up                                                                                  | Post-acute | 16S rRNA sequencing            | Microbiota richness was not restored to normal levels after 6-month recovery.<br>Post-convalescence patients with lower microbial richness had worse pulmonary functions.                                                                                                         |
| Liu, et al. <sup>527</sup><br>(2022)                | Hong Kong, China               | 106 patients with COVID-19;<br>68 uninfected individuals as controls; 6-month follow up                                                                                 | Post-acute | Shotgun metagenomic sequencing | Enriched in patients with PACS:<br><i>Ruminococcus gnavus</i> and <i>Bacteroides vulgatus</i><br><br>Enriched in patients without PACS:<br><i>Faecalibacterium prausnitzii</i>                                                                                                    |
| Vestad, et al. <sup>528</sup><br>(2022)             | Norway                         | 181 patients with COVID-19;<br>149 completed the 3-month follow-up                                                                                                      | Post-acute | 16S rRNA gene sequencing       | Long-term respiratory dysfunction was associated with increased relative abundance of genus <i>Veillonella</i> , <i>Flavonifractor</i> and reduced relative abundance of <i>Erysipelotrichaceae</i> UCG-003 and several members of the Lachnospiraceae and Ruminococcaceae family |
| Cui, et al. <sup>529</sup><br>(2022)                | Zhengzhou, China <sup>95</sup> | 35 patients with COVID-19;<br>160 healthy controls; 1-year follow-up                                                                                                    | Post-acute | 16S rRNA gene sequencing       | The microbial diversity, butyric acid-producing microbes and <i>Bifidobacterium</i> gradually increased, whereas lipopolysaccharide-producing microbes gradually decreased at 1-year follow-up, when compared with at discharge.                                                  |
| Su, et al. <sup>530</sup>                           | Hong Kong, China               | 155 patients with COVID-1;<br>155 patients with COVID-19 ; an average of 14-month (IQR 11–18 months) follow-up                                                          | Post-acute | Shotgun metagenomic sequencing | Enriched bacteria taxa in recovery patients:<br><i>Erysipelatoclostridium ramosum</i> and <i>Ruminococcus gnavus</i> ,<br><br>Enriched bacteria taxa in healthy controls:<br><i>Bifidobacterium adolescentis</i> and <i>Bifidobacterium pseudocatenuatum</i>                      |

## Supplementary Table 2 | Clinical trials using gut microbiota modulation in COVID-19 management.

Table 2 provides an overview of clinical trials using gut microbiota modulation for COVID-19 management, in both acute COVID-19 and post-acute COVID-19 treatment. As of August 2022, a total of 34 studies have been registered on [ClinicalTrials.gov](https://clinicaltrials.gov) to evaluate the efficacy of oral probiotics and FMT in the treatment and prevention of COVID-19. COVID-19, coronavirus disease 2019; FMT, faecal microbiota transplantation.

| <i>Acute COVID-19 and post-acute COVID-19 Treatment</i> |                  |          |                                                                                                                                                                                                                                                                                                                                                                                                                                 |                                                                                                                  |
|---------------------------------------------------------|------------------|----------|---------------------------------------------------------------------------------------------------------------------------------------------------------------------------------------------------------------------------------------------------------------------------------------------------------------------------------------------------------------------------------------------------------------------------------|------------------------------------------------------------------------------------------------------------------|
| <b>Trial identification</b>                             | <b>Location</b>  | <b>n</b> | <b>Intervention</b>                                                                                                                                                                                                                                                                                                                                                                                                             | <b>Study aim</b>                                                                                                 |
| NCT04366089                                             | Italy            | 152      | Probiotics ( <i>Bifidobacterium lactis</i> DSM 32246 + <i>Bifidobacterium lactis</i> DSM 32247 + <i>Lactobacillus acidophilus</i> DSM 32241 + <i>Lactobacillus helveticus</i> DSM 32242 + <i>Lactobacillus paracasei</i> DSM 32243 + <i>Lactobacillus plantarum</i> DSM 32244 + <i>Lactobacillus brevis</i> DSM 27961 + <i>Streptococcus thermophilus</i> DSM322245) + Oxygen-ozone therapy + Azithromycin + Hydroxychloroquine | To evaluate the effects on early control of COVID-19 progression as an adjuvant and modulation of gut microbiota |
| NCT04390477                                             | Spain            | 41       | Probiotics                                                                                                                                                                                                                                                                                                                                                                                                                      | To evaluate the effects in hospitalised patients with COVID-19                                                   |
| NCT04420676                                             | Austria          | 30       | Probiotics ( <i>Bifidobacterium bifidum</i> W23 + <i>Bifidobacterium lactis</i> W18 + <i>Bifidobacterium longum</i> W51 + <i>Enterococcus faecium</i> W54 + <i>Lactobacillus acidophilus</i> W55 + <i>Lactobacillus acidophilus</i> W37 + <i>Lactobacillus salivarius</i> W24 + <i>Lactobacillus plantarum</i> W62 + <i>Lactobacillus paracasei</i> W72 + <i>Lactobacillus rhamnosus</i> W71) vs placebo                        | To evaluate the effects on gastrointestinal symptoms in COVID-19                                                 |
| NCT04507867                                             | Mexico           | 80       | Probiotics ( <i>Saccharomyces boulardii</i> CNCM I-745)                                                                                                                                                                                                                                                                                                                                                                         | To evaluate the efficacy in reducing complications and co-morbidities in severe COVID-19                         |
| NCT04517422                                             | Mexico           | 300      | Probiotics ( <i>Lactobacillus plantarum</i> CECT30292 + <i>Lactobacillus plantarum</i> CECT 7484 + <i>Lactobacillus plantarum</i> CECT 7485 + <i>Pediococcus acidilactici</i> CECT 7483) vs placebo                                                                                                                                                                                                                             | To evaluate the effects and safety in adults with COVID-19                                                       |
| NCT04581018                                             | Hong Kong, China | 50       | Synbiotics (SIM01)                                                                                                                                                                                                                                                                                                                                                                                                              | To evaluate the efficacy in alleviating symptoms in hospitalised COVID-19 patients                               |
| NCT04621071                                             | Canada           | 17       | Probiotics vs placebo                                                                                                                                                                                                                                                                                                                                                                                                           | To evaluate the efficacy in reducing duration and symptoms of COVID-19                                           |



|             |                  |     |                                                                                                                                                                                                                                                                                                                                                                                                                                                                                                                                                                                                                                                                                                                                                                                                                   |                                                                                                                                          |
|-------------|------------------|-----|-------------------------------------------------------------------------------------------------------------------------------------------------------------------------------------------------------------------------------------------------------------------------------------------------------------------------------------------------------------------------------------------------------------------------------------------------------------------------------------------------------------------------------------------------------------------------------------------------------------------------------------------------------------------------------------------------------------------------------------------------------------------------------------------------------------------|------------------------------------------------------------------------------------------------------------------------------------------|
| NCT04666116 | Spain            | 96  | Probiotics ( <i>Bifidobacterium longum</i> + <i>Bifidobacterium animalis</i> subsp. <i>Lactis</i> + <i>Lactobacillus rhamnosus</i> ) + Vitamin D + Selenium + Zinc                                                                                                                                                                                                                                                                                                                                                                                                                                                                                                                                                                                                                                                | To evaluate the change in viral load in patients with COVID-19                                                                           |
| NCT04730284 | Hong Kong, China | 20  | Synbiotics (SIM01)                                                                                                                                                                                                                                                                                                                                                                                                                                                                                                                                                                                                                                                                                                                                                                                                | To evaluate the efficacy in alleviating symptoms in COVID-19 outpatients                                                                 |
| NCT04824222 | Poland           | 366 | FMT vs placebo                                                                                                                                                                                                                                                                                                                                                                                                                                                                                                                                                                                                                                                                                                                                                                                                    | To evaluate the efficacy in reducing the risk of COVID-19 disease progression with escalating cytokine storm and inflammatory parameters |
| NCT04877704 | UK               | 60  | Probiotics ( <i>Enterococcus faecium</i> + <i>Lactobacillus acidophilus</i> + <i>Lactobacillus plantarum</i> + <i>Lactobacillus rhamnosus</i> ) vs placebo                                                                                                                                                                                                                                                                                                                                                                                                                                                                                                                                                                                                                                                        | To evaluate the effects on COVID-19 management as an adjuvant                                                                            |
| NCT04907877 | Ukraine          | 300 | Probiotics ( <i>Bifidobacteria</i> + <i>Lactobacilli</i> ) vs placebo                                                                                                                                                                                                                                                                                                                                                                                                                                                                                                                                                                                                                                                                                                                                             | To evaluate the effects in symptomatic adult outpatients with COVID-19                                                                   |
| NCT04937556 | Spain            | 60  | Probiotics ( <i>Lactobacillus salivarius</i> ) + Vitamin D + Zinc vs placebo                                                                                                                                                                                                                                                                                                                                                                                                                                                                                                                                                                                                                                                                                                                                      | To evaluate the effects in immune response in COVID-19                                                                                   |
| NCT04941703 | USA              | 30  | Probiotics + Magnesium citrate                                                                                                                                                                                                                                                                                                                                                                                                                                                                                                                                                                                                                                                                                                                                                                                    | To evaluate the effects on COVID-19 severity                                                                                             |
| NCT05043376 | Pakistan         | 50  | Probiotics ( <i>Streptococcus salivarius</i> K12)                                                                                                                                                                                                                                                                                                                                                                                                                                                                                                                                                                                                                                                                                                                                                                 | To investigate the treatment benefits for non-ICU hospitalised patients with COVID-19                                                    |
| NCT05175833 | Brazil           | 70  | Probiotics ( <i>Streptococcus salivarius</i> K12 + <i>Lactobacillus brevis</i> CD2) vs placebo                                                                                                                                                                                                                                                                                                                                                                                                                                                                                                                                                                                                                                                                                                                    | To evaluate the effects on secondary bacterial pneumonia in severe COVID-19                                                              |
| NCT05474144 | Czech Republic   | 83  | Probiotics ( <i>Bifidobacterium animalis</i> BA77 + <i>Bifidobacterium bifidum</i> BB47 + <i>Bifidobacterium breve</i> BB8 + <i>Bifidobacterium infantis</i> BI211 + <i>Bifidobacterium lactis</i> BI516 + <i>Bifidobacterium lactis</i> BI-04 + <i>Bifidobacterium lactis</i> HN019 + <i>Bifidobacterium lactis</i> subsp. <i>Infantis</i> Bi-07 + <i>Bifidobacterium longum</i> BL88 ONLLY + <i>Lactobacillus acidophilus</i> LA 11 ONLLY + <i>Lactobacillus acidophilus</i> LA14 + <i>Lactobacillus acidophilus</i> NCFM + <i>Lactobacillus casei</i> LC18 + <i>Lactobacillus plantarum</i> LP ONLLY + <i>Lactobacillus reuteri</i> LE16 + <i>Lactobacillus rhamnosus</i> HN001 + <i>Lactobacillus rhamnosus</i> LGG + <i>Lactobacillus rhamnosus</i> LR22 + <i>Streptococcus thermophilus</i> ST6) vs placebo | To evaluate the effects in patients with severe COVID-19                                                                                 |

|                                                                   |                  |                               |                                                                                                                                                                                                                                                                                                                  |                                                                                                                 |
|-------------------------------------------------------------------|------------------|-------------------------------|------------------------------------------------------------------------------------------------------------------------------------------------------------------------------------------------------------------------------------------------------------------------------------------------------------------|-----------------------------------------------------------------------------------------------------------------|
| NCT04813718                                                       | Austria          | 20                            | Probiotics ( <i>Lactobacillus delbrueckii</i> ssp. <i>Bulgaricus</i> LB2 (LMG P-21905) + <i>Lactobacillus rhamnosus</i> SP1 (DSM 21690) + <i>Lactobacillus reuteri</i> DSM 12246 + <i>Lactobacillus rhamnosus</i> CRL1505 (DSM 29673) + <i>Bifidobacterium animalis</i> ssp. <i>Lactis</i> DSM 15954) vs placebo | To evaluate the effects on post-acute COVID-19 syndrome                                                         |
| NCT04950803                                                       | Hong Kong, China | 280                           | Synbiotics (SIM01) vs placebo                                                                                                                                                                                                                                                                                    | To evaluate the efficacy in alleviating symptoms of post-acute COVID-19 syndrome                                |
| NCT05080244                                                       | Canada           | 618                           | Probiotics vs placebo                                                                                                                                                                                                                                                                                            | To evaluate the efficacy in reducing occurrence of post-acute COVID-19 syndrome                                 |
| NCT05227170                                                       | USA              | 80                            | Probiotics ( <i>Lactobacillus plantarum</i> 299v) vs placebo                                                                                                                                                                                                                                                     | To evaluate the effects on vascular function in patients with post-acute COVID-19 syndrome                      |
| <b>Prevention of COVID-19 and enhancement of vaccine response</b> |                  |                               |                                                                                                                                                                                                                                                                                                                  |                                                                                                                 |
| <b>Trial Identification</b>                                       | <b>Location</b>  | <b>Number of Participants</b> | <b>Intervention</b>                                                                                                                                                                                                                                                                                              | <b>Study Aim</b>                                                                                                |
| NCT04366180                                                       | Spain            | 314                           | Probiotics vs placebo                                                                                                                                                                                                                                                                                            | To evaluate the effect on COVID-19 prevention in healthcare workers                                             |
| NCT04399252                                                       | USA              | 182                           | Probiotics ( <i>Lactobacillus rhamnosus</i> GG) vs placebo                                                                                                                                                                                                                                                       | To evaluate the effects on the microbiome in household contacts exposed to COVID-19                             |
| NCT04462627                                                       | Belgium          | 500                           | Probiotics                                                                                                                                                                                                                                                                                                       | To evaluate the effects on circulating levels of natural anti-A and anti-B antibodies in healthy individuals    |
| NCT04734886                                                       | Sweden           | 161                           | Probiotics ( <i>Lactobacillus reuteri</i> DSM 17938) + vitamin D vs placebo + vitamin D                                                                                                                                                                                                                          | To evaluate the effects on antibody response upon and after COVID-19 in healthy adults                          |
| NCT04756466                                                       | Spain            | 201                           | Probiotics ( <i>Lactobacilli</i> ) vs placebo                                                                                                                                                                                                                                                                    | To evaluate the effects on COVID-19 incidence in those aged over 60 years                                       |
| NCT04847349                                                       | USA              | 54                            | Probiotics vs placebo                                                                                                                                                                                                                                                                                            | To evaluate the efficacy in boosting anti-SARS-CoV-2 immunity                                                   |
| NCT04884776                                                       | Hong Kong, China | 484                           | Synbiotics (SIM01) vs placebo                                                                                                                                                                                                                                                                                    | To evaluate the efficacy in enhancing immunity and reducing hospitalisation in patients with diabetes and those |

|             |           |     |                                                                                                   |                                                                       |
|-------------|-----------|-----|---------------------------------------------------------------------------------------------------|-----------------------------------------------------------------------|
|             |           |     |                                                                                                   | aged over 65 years during COVID-19 pandemic                           |
| NCT04922918 | Spain     | 25  | Probiotics ( <i>Ligilactobacillus salivarius</i> MP101)                                           | To evaluate the effects in elderly during COVID-19                    |
| NCT04979065 | Indonesia | 80  | Probiotics + Vitamin D vs placebo                                                                 | To evaluate the efficacy in reducing COVID-19 risk in obese people    |
| NCT04798677 | Spain     | 90  | Probiotics ( <i>Saccharomyces cerevisiae</i> ) + Beta-glucan complex + Selenium + Zinc vs placebo | To evaluate the effects and tolerability in COVID-19 or flu vaccinees |
| NCT05195151 | Canada    | 668 | Probiotics vs placebo                                                                             | To evaluate the efficacy in modulating COVID-19 vaccine response      |

### Supplementary reference list

- S1. Romani, L. *et al.* The Relationship Between Pediatric Gut Microbiota and SARS-CoV-2 Infection. *Front. Cell. Infect. Microbiol.* **12**, 908492 (2022).
- S2. Mizutani, T. *et al.* Correlation Analysis between Gut Microbiota Alterations and the Cytokine Response in Patients with Coronavirus Disease during Hospitalization. *Microbiol. Spectr.* **10**, e01689-21 (2022).
- S3. Rafiqul Islam, S. *et al.* Dysbiosis of oral and gut microbiomes in SARS-CoV-2 infected patients in Bangladesh: elucidating the role of opportunistic gut microbes. *Front. Med.* **9**, 163 (2022).
- S4. Schult, D. *et al.* Gut bacterial dysbiosis and instability is associated with the onset of complications and mortality in COVID-19. *Gut Microbes* **14**, 2031840 (2022).
- S5. Sun, Z. *et al.* Gut microbiome alterations and gut barrier dysfunction are associated with host immune homeostasis in COVID-19 patients. *BMC Med.* **20**, 1-13 (2022).
- S6. Britton, G. J. *et al.* Limited intestinal inflammation despite diarrhea, fecal viral RNA and SARS-CoV-2-specific IgA in patients with acute COVID-19. *Sci. Rep.* **11**, 1-13 (2021).
- S7. Gaibani, P. *et al.* The Gut Microbiota of Critically Ill Patients With COVID-19. *Front. Cell. Infect. Microbiol.* **11** (2021).
- S8. Li, S. *et al.* Microbiome Profiling Using Shotgun Metagenomic Sequencing Identified Unique Microorganisms in COVID-19 Patients With Altered Gut Microbiota. *Front. Microbiol.* **12** (2021).
- S9. Moreira-Rosário, A. *et al.* Gut microbiota diversity and C-Reactive Protein are predictors of disease severity in COVID-19 patients. *Front. Microbiol.* **12**, 1820 (2021).
- S10. Newsome, R. C. *et al.* The gut microbiome of COVID-19 recovered patients returns to uninfected status in a minority-dominated United States cohort. *Gut Microbes* **13**, 1926840 (2021).
- S11. Reinold, J. *et al.* A Pro-Inflammatory Gut Microbiome Characterizes SARS-CoV-2 Infected Patients and a Reduction in the Connectivity of an Anti-Inflammatory Bacterial Network Associates With Severe COVID-19. *Front. Cell. Infect. Microbiol.* **11**, 1154 (2021).
- S12. Ren, Z. *et al.* Alterations in the human oral and gut microbiomes and lipidomics in COVID-19. *Gut* **70**, 1253-1265 (2021).
- S13. Wu, Y. *et al.* Altered oral and gut microbiota and its association with SARS-CoV-2 viral load in COVID-19 patients during hospitalization. *NPJ Biofilms Microbiomes* **7**, 1-9 (2021).
- S14. Xu, R. *et al.* Temporal association between human upper respiratory and gut bacterial microbiomes during the course of COVID-19 in adults. *Commun. Biol.* **4**, 1-11 (2021).
- S15. Yeoh, Y. K. *et al.* Gut microbiota composition reflects disease severity and dysfunctional immune responses in patients with COVID-19. *Gut* **70**, 698-706 (2021).
- S16. Zhou, Y. *et al.* Gut microbiota dysbiosis correlates with abnormal immune response in moderate COVID-19 patients with fever. *J. Inflamm. Res.* **14**, 2619 (2021).
- S17. Al Bataineh, M. T. *et al.* Gut microbiota interplay with COVID-19 reveals links to host lipid metabolism among Middle Eastern populations. *Front. Microbiol.* **12**

- (2021).
- S18. Babszky, G. *et al.* COVID-19 Infection Alters the Microbiome: Elite Athletes and Sedentary Patients Have Similar Bacterial Flora. *Genes* **12**, 1577 (2021).
- S19. Gu, S. *et al.* Alterations of the gut microbiota in patients with coronavirus disease 2019 or H1N1 influenza. *Clin. Infect. Dis.* **71**, 2669-2678 (2020).
- S20. Tang, L. *et al.* Clinical significance of the correlation between changes in the major intestinal bacteria species and COVID-19 severity. *Engineering* **6**, 1178-1184 (2020).
- S21. Tao, W. *et al.* Analysis of the intestinal microbiota in COVID-19 patients and its correlation with the inflammatory factor IL-18. *Med. Microecol.* **5**, 100023 (2020).
- S22. Zuo, T. *et al.* Temporal landscape of human gut RNA and DNA virome in SARS-CoV-2 infection and severity. *Microbiome* **9**, 1-16 (2021).
- S23. Maeda, Y. *et al.* Longitudinal alterations of the gut mycobiota and microbiota on COVID-19 severity. *BMC Infect. Dis.* **22**, 1-13 (2022).
- S24. Lv, L. *et al.* Gut mycobiota alterations in patients with COVID-19 and H1N1 infections and their associations with clinical features. *Commun. Biol.* **4**, 1-11 (2021).
- S25. Zuo, T. *et al.* Alterations in fecal fungal microbiome of patients with COVID-19 during time of hospitalization until discharge. *Gastroenterology* **159**, 1302-1310. e1305 (2020).
- S26. Chen, Y. *et al.* Six-month follow-up of gut microbiota richness in patients with COVID-19. *Gut* **71**, 222-225 (2022).
- S27. Liu, Q. *et al.* Gut microbiota dynamics in a prospective cohort of patients with post-acute COVID-19 syndrome. *Gut* **71**, 544-552 (2022).
- S28. Vestad, B. *et al.* Respiratory dysfunction three months after severe COVID-19 is associated with gut microbiota alterations. *J. Intern. Med.* **291**, 801-812 (2022).
- S29. Cui, G. Y. *et al.* Characterization of oral and gut microbiome and plasma metabolomics in COVID-19 patients after 1-year follow-up. *Mil. Med. Res.* **9**, 1-13 (2022).
- S30. Su, Q., Lau, R. I., Liu, Q., Chan, F. K. L. & Ng, S. C. Post-acute COVID-19 syndrome and gut dysbiosis linger beyond 1 year after SARS-CoV-2 clearance. *Gut*, doi:10.1136/gutjnl-2022-328319 (2022).
